# Supplementary material for: Photosynthetic Pigments Changes of Three Phenotypes of Picocyanobacteria Synechococcus sp. under Different Light and Temperature Conditions
Source: PubMed Central journal article supplement (PMC7563753; doi:10.3390/cells9092030), 2020-09-03
Supplement: cells-09-02030-s001.pdf [file cells-09-02030-s001.pdf]

## Supplementary material

**Table S1.** Two-way factorial ANOVA of cells concentration measured in *Synechococcus* sp. Type 1, Type 2, and Type 3a growing at different temperatures (°C) and irradiance ( $\mu\text{mol photons m}^{-2}\text{s}^{-1}$ ): df – degrees of freedom; F – Fisher's F-test statistic; Mss – mean sum of squares; Ss – sum of squares. Levels of significance were: \*  $p < 0.05$ ; \*\*  $p < 0.01$ ; \*\*\*  $p < 0.001$ .

| <i>Synechococcus</i> sp. | Source of variation | Df | Ss     | Mss    | F        |
|--------------------------|---------------------|----|--------|--------|----------|
| Type 1                   | temperature         | 2  | 39.464 | 19.732 | 118.1*** |
|                          | irradiation         | 3  | 21.064 | 7.021  | 42.0***  |
|                          | interaction         | 6  | 8.648  | 1.441  | 8.6***   |
|                          | error               | 24 | 4.010  | 0.167  |          |
| Type 2                   | temperature         | 2  | 36.673 | 18.336 | 180.2*** |
|                          | irradiation         | 3  | 10.130 | 3.377  | 33.2***  |
|                          | interaction         | 6  | 2.393  | 0.399  | 3.9**    |
|                          | error               | 24 | 2.442  | 0.102  |          |
| Type 3a                  | temperature         | 2  | 8.066  | 4.033  | 87.6***  |
|                          | irradiation         | 3  | 4.690  | 1.563  | 34.0***  |
|                          | interaction         | 6  | 1.363  | 0.227  | 4.9**    |
|                          | error               | 24 | 1.105  | 0.046  |          |

**Table S2.** Two-way factorial ANOVA of cell-specific Chl *a*, Phyco, and Car content measured in *Synechococcus* sp. Type 1, Type 2, and Type 3a growing at different temperatures (°C) and irradiance ( $\mu\text{mol photons m}^{-2}\text{s}^{-1}$ ): df – degrees of freedom; F – Fisher's F-test statistic; Mss – mean sum of squares; Ss – sum of squares. Levels of significance were: \*  $p < 0.05$ ; \*\*  $p < 0.01$ ; \*\*\*  $p < 0.001$ .

| <i>Synechococcus</i> sp. | Cell-specific pigment content | Source of variation | Df | Ss       | Mss      | F        |
|--------------------------|-------------------------------|---------------------|----|----------|----------|----------|
| Type 1                   | Chl <i>a</i>                  | temperature         | 2  | 7.016    | 3.508    | 57.9***  |
|                          |                               | irradiation         | 3  | 20.639   | 6.880    | 113.6*** |
|                          |                               | interaction         | 6  | 8.683    | 1.447    | 23.9***  |
|                          |                               | error               | 24 | 1.453    | 0.061    |          |
|                          | Phyco                         | temperature         | 2  | 2108.089 | 1054.045 | 151.7*** |
|                          |                               | irradiation         | 3  | 1484.269 | 494.756  | 71.2***  |
|                          |                               | interaction         | 6  | 669.328  | 111.555  | 16.1***  |
|                          |                               | error               | 24 | 166.806  | 6.950    |          |
|                          | Car                           | temperature         | 2  | 2.800    | 1.400    | 208.1*** |
|                          |                               | irradiation         | 3  | 0.348    | 0.116    | 17.3***  |
|                          |                               | interaction         | 6  | 3.249    | 0.542    | 80.5***  |
|                          |                               | error               | 24 | 0.161    | 0.007    |          |
| Type 2                   | Chl <i>a</i>                  | temperature         | 2  | 0.544    | 0.272    | 9.0**    |
|                          |                               | irradiation         | 3  | 66.455   | 22.152   | 737.2*** |
|                          |                               | interaction         | 6  | 1.920    | 0.320    | 10.6***  |
|                          |                               | error               | 24 | 0.721    | 0.030    |          |
|                          | Phyco                         | temperature         | 2  | 713.744  | 356.872  | 96.8***  |
|                          |                               | irradiation         | 3  | 2523.931 | 841.310  | 228.3*** |
|                          |                               | interaction         | 6  | 1542.349 | 257.058  | 69.8***  |
|                          |                               | error               | 24 | 88.448   | 3.685    |          |
|                          | Car                           | temperature         | 2  | 0.218    | 0.109    | 3.8*     |
|                          |                               | irradiation         | 3  | 0.616    | 0.205    | 7.2**    |
|                          |                               | interaction         | 6  | 1.402    | 0.234    | 8.2***   |
|                          |                               | error               | 24 | 0.687    | 0.029    |          |
| Type 3a                  | Chl <i>a</i>                  | temperature         | 2  | 16.125   | 8.062    | 25.3***  |
|                          |                               | irradiation         | 3  | 46.366   | 15.455   | 48.5***  |
|                          |                               | interaction         | 6  | 32.352   | 5.392    | 16.9***  |
|                          |                               | error               | 24 | 7.642    | 0.318    |          |
|                          | Phyco                         | temperature         | 2  | 51.427   | 25.713   | 29.9***  |
|                          |                               | irradiation         | 3  | 2034.580 | 678.193  | 788.1*** |
|                          |                               | interaction         | 6  | 557.364  | 92.894   | 107.9*** |
|                          |                               | error               | 24 | 20.654   | 0.861    |          |
|                          | Car                           | temperature         | 2  | 2.749    | 1.374    | 8.7**    |
|                          |                               | irradiation         | 3  | 0.370    | 0.123    | 0.8      |
|                          |                               | interaction         | 6  | 7.481    | 1.247    | 7.9***   |
|                          |                               | error               | 24 | 3.795    | 0.158    |          |

**Table S3.** Two-way factorial ANOVA of cell-specific PE, PC, and APC content measured in *Synechococcus* sp. Type 1, Type 2, and Type 3a growing at different temperatures (°C) and irradiance ( $\mu\text{mol photons m}^{-2}\text{s}^{-1}$ ): df – degrees of freedom; F – Fisher's F-test statistic; Mss – mean sum of squares; Ss – sum of squares. Levels of significance were: \*  $p < 0.05$ ; \*\*  $p < 0.01$ ; \*\*\*  $p < 0.001$ .

| <i>Synechococcus</i> sp. | Cell-specific pigment content | Source of variation | Df | Ss       | Mss     | F        |
|--------------------------|-------------------------------|---------------------|----|----------|---------|----------|
| Type 1                   | PE                            | temperature         | 2  | 134.884  | 67.442  | 116.1*** |
|                          |                               | irradiation         | 3  | 89.066   | 29.689  | 51.1***  |
|                          |                               | interaction         | 6  | 39.980   | 6.663   | 11.5***  |
|                          |                               | error               | 24 | 13.940   | 0.581   |          |
|                          | PC                            | temperature         | 2  | 736.334  | 368.167 | 99.0***  |
|                          |                               | irradiation         | 3  | 602.840  | 200.947 | 54.0***  |
|                          |                               | interaction         | 6  | 294.321  | 49.054  | 13.2***  |
|                          |                               | error               | 24 | 89.276   | 3.720   |          |
|                          | APC                           | temperature         | 2  | 37.955   | 18.978  | 108.2*** |
|                          |                               | irradiation         | 3  | 13.442   | 4.481   | 25.6***  |
|                          |                               | interaction         | 6  | 18.304   | 3.051   | 17.4***  |
|                          |                               | error               | 24 | 4.209    | 0.175   |          |
| Type 2                   | PE                            | temperature         | 2  | 499.665  | 249.833 | 126.7*** |
|                          |                               | irradiation         | 3  | 2236.924 | 745.641 | 378.2*** |
|                          |                               | interaction         | 6  | 1189.413 | 198.235 | 100.6*** |
|                          |                               | error               | 24 | 47.311   | 1.971   |          |
|                          | PC                            | temperature         | 2  | 13.915   | 6.957   | 52.0***  |
|                          |                               | irradiation         | 3  | 9.946    | 3.315   | 24.8***  |
|                          |                               | interaction         | 6  | 20.718   | 3.453   | 25.8***  |
|                          |                               | error               | 24 | 3.210    | 0.134   |          |
|                          | APC                           | temperature         | 2  | 1.012    | 0.506   | 63.0***  |
|                          |                               | irradiation         | 3  | 1.112    | 0.371   | 46.1***  |
|                          |                               | interaction         | 6  | 0.251    | 0.042   | 5.2**    |
|                          |                               | error               | 24 | 0.193    | 0.008   |          |
| Type 3a                  | PE                            | temperature         | 2  | 42.136   | 21.068  | 22.4***  |
|                          |                               | irradiation         | 3  | 1374.341 | 458.114 | 486.6*** |
|                          |                               | interaction         | 6  | 311.636  | 51.939  | 55.2***  |
|                          |                               | error               | 24 | 22.593   | 0.941   |          |
|                          | PC                            | temperature         | 2  | 9.746    | 4.873   | 70.0***  |
|                          |                               | irradiation         | 3  | 45.038   | 15.013  | 215.5*** |
|                          |                               | interaction         | 6  | 32.867   | 5.478   | 78.6***  |
|                          |                               | error               | 24 | 1.672    | 0.070   |          |
|                          | APC                           | temperature         | 2  | 4.543    | 2.272   | 34.2***  |
|                          |                               | irradiation         | 3  | 3.813    | 1.271   | 19.1***  |
|                          |                               | interaction         | 6  | 1.304    | 0.217   | 3.3*     |
|                          |                               | error               | 24 | 1.593    | 0.066   |          |

**Table S4.** Two-way factorial ANOVA of cell-specific Zea and  $\beta$ -Car content measured in *Synechococcus* sp. Type 1, Type 2, and Type 3a growing at different temperatures ( $^{\circ}\text{C}$ ) and irradiance ( $\mu\text{mol photons m}^{-2}\text{s}^{-1}$ ): df – degrees of freedom; F – Fisher's F-test statistic; Mss – mean sum of squares; Ss – sum of squares. Levels of significance were: \*  $p < 0.05$ ; \*\*  $p < 0.01$ ; \*\*\*  $p < 0.001$ .

| <i>Synechococcus</i> sp. | Cell-specific pigment content | Source of variation | Df | Ss    | Mss   | F        |
|--------------------------|-------------------------------|---------------------|----|-------|-------|----------|
| Type 1                   | Zea                           | temperature         | 2  | 2.511 | 1.255 | 236.3*** |
|                          |                               | irradiation         | 3  | 0.272 | 0.091 | 17.0***  |
|                          |                               | interaction         | 6  | 3.451 | 0.575 | 108.3*** |
|                          |                               | error               | 24 | 0.127 | 0.005 |          |
|                          | $\beta$ -Car                  | temperature         | 2  | 0.002 | 0.001 | 1.2      |
|                          |                               | irradiation         | 3  | 0.004 | 0.001 | 2.2      |
|                          |                               | interaction         | 6  | 0.034 | 0.006 | 8.9***   |
|                          |                               | error               | 24 | 0.015 | 0.001 |          |
| Type 2                   | Zea                           | temperature         | 2  | 0.086 | 0.043 | 3.4*     |
|                          |                               | irradiation         | 3  | 0.788 | 0.263 | 20.9***  |
|                          |                               | interaction         | 6  | 0.743 | 0.124 | 9.9***   |
|                          |                               | error               | 24 | 0.301 | 0.013 |          |
|                          | $\beta$ -Car                  | temperature         | 2  | 0.153 | 0.077 | 29.6***  |
|                          |                               | irradiation         | 3  | 0.006 | 0.002 | 0.7      |
|                          |                               | interaction         | 6  | 0.067 | 0.011 | 4.3**    |
|                          |                               | error               | 24 | 0.062 | 0.003 |          |
| Type 3a                  | Zea                           | temperature         | 2  | 1.155 | 0.577 | 6.2**    |
|                          |                               | irradiation         | 3  | 0.445 | 0.148 | 1.6      |
|                          |                               | interaction         | 6  | 6.646 | 1.108 | 11.9***  |
|                          |                               | error               | 24 | 2.242 | 0.093 |          |
|                          | $\beta$ -Car                  | temperature         | 2  | 0.644 | 0.322 | 52.6***  |
|                          |                               | irradiation         | 3  | 0.035 | 0.012 | 1.9      |
|                          |                               | interaction         | 6  | 0.074 | 0.012 | 2.0      |
|                          |                               | error               | 24 | 0.147 | 0.006 |          |

**Table S5.** Two-way factorial ANOVA of Zea/Chl *a* ratio and  $\beta$ -Car/Chl *a* ratio measured in *Synechococcus* sp. Type 1, Type 2, and Type 3a growing at different temperatures ( $^{\circ}\text{C}$ ) and irradiance ( $\mu\text{mol photons m}^{-2}\text{s}^{-1}$ ): df – degrees of freedom; F – Fisher's F-test statistic; Mss – mean sum of squares; Ss – sum of squares. Levels of significance were: \*  $p < 0.05$ ; \*\*  $p < 0.01$ ; \*\*\*  $p < 0.001$ .

| <i>Synechococcus</i> sp. | Cell-specific pigment ratio | Source of variation | Df | Ss    | Mss   | F        |
|--------------------------|-----------------------------|---------------------|----|-------|-------|----------|
| Type 1                   | Zea/Chl <i>a</i>            | temperature         | 2  | 0.010 | 0.005 | 0.3      |
|                          |                             | irradiation         | 3  | 4.097 | 1.366 | 73.9***  |
|                          |                             | interaction         | 6  | 0.243 | 0.041 | 2.2      |
|                          |                             | error               | 24 | 0.444 | 0.018 |          |
|                          | $\beta$ -Car/Chl <i>a</i>   | temperature         | 2  | 0.001 | 0.001 | 2.1      |
|                          |                             | irradiation         | 3  | 0.017 | 0.006 | 21.1***  |
|                          |                             | interaction         | 6  | 0.031 | 0.005 | 18.7***  |
|                          |                             | error               | 24 | 0.007 | 0.000 |          |
| Type 2                   | Zea/Chl <i>a</i>            | temperature         | 2  | 1.564 | 0.782 | 100.4*** |
|                          |                             | irradiation         | 3  | 9.929 | 3.310 | 425.2*** |
|                          |                             | interaction         | 6  | 2.307 | 0.384 | 49.4***  |
|                          |                             | error               | 24 | 0.187 | 0.008 |          |
|                          | $\beta$ -Car/Chl <i>a</i>   | temperature         | 2  | 0.019 | 0.009 | 6.0**    |
|                          |                             | irradiation         | 3  | 0.082 | 0.027 | 17.5***  |
|                          |                             | interaction         | 6  | 0.037 | 0.006 | 3.9**    |
|                          |                             | error               | 24 | 0.038 | 0.002 |          |
| Type 3a                  | Zea/Chl <i>a</i>            | temperature         | 2  | 0.015 | 0.008 | 2.2      |
|                          |                             | irradiation         | 3  | 1.467 | 0.489 | 141.5*** |
|                          |                             | interaction         | 6  | 0.049 | 0.008 | 2.4      |
|                          |                             | error               | 24 | 0.083 | 0.003 |          |
|                          | $\beta$ -Car/Chl <i>a</i>   | temperature         | 2  | 0.037 | 0.019 | 117.3*** |
|                          |                             | irradiation         | 3  | 0.022 | 0.007 | 46.2***  |
|                          |                             | interaction         | 6  | 0.021 | 0.003 | 21.6***  |
|                          |                             | error               | 24 | 0.004 | 0.000 |          |

**Table S6.** The Phyco/Chl *a* ratios and Phyco/Car ratios obtained after 14 days of experiment for three phenotypes of *Synechococcus* sp.: Type 1 (A), Type 2 (B), Type 3a (C) under different temperature (°C) and light ( $\mu\text{mol photons m}^{-2}\text{s}^{-1}$ ) conditions.

| Experimental conditions:<br>temperature (°C);<br>irradiance<br>( $\mu\text{mol photons m}^{-2}\text{s}^{-1}$ ) | Phyco/Chl <i>a</i> |         |         | Phyco/Car |          |          |
|----------------------------------------------------------------------------------------------------------------|--------------------|---------|---------|-----------|----------|----------|
|                                                                                                                | A                  | B       | C       | A         | B        | C        |
| 15; 10                                                                                                         | 2.3±0.3            | 2.4±0.6 | 3.5±0.3 | 6.4±0.8   | 6.3±1.3  | 9.6±1.4  |
| 15; 55                                                                                                         | 1.0±0.1            | 1.4±0.2 | 1.8±0.7 | 1.6±0.2   | 1.4±0.3  | 2.5±1.1  |
| 15; 100                                                                                                        | 0.5±0.1            | 1.9±0.7 | 0.7±0.1 | 0.5±0.1   | 1.9±0.7  | 1.0±0.0  |
| 15; 145                                                                                                        | 2.1±0.6            | 1.9±0.6 | 1.0±0.4 | 1.6±0.5   | 1.8±0.6  | 1.0±0.4  |
| 22.5; 10                                                                                                       | 6.9±2.0            | 4.5±1.5 | 5.0±0.5 | 25.6±0.8  | 15.6±3.5 | 21.1±1.3 |
| 22.5; 55                                                                                                       | 1.7±0.1            | 7.2±2.3 | 4.2±3.5 | 2.4±0.1   | 8.2±1.3  | 5.9±4.5  |
| 22.5; 100                                                                                                      | 2.6±1.4            | 7.6±2.1 | 2.2±0.4 | 3.3±1.9   | 5.7±1.3  | 2.9±0.6  |
| 22.5; 145                                                                                                      | 3.4±2.2            | 4.6±0.9 | 1.5±0.6 | 4.0±2.7   | 3.8±1.5  | 1.7±0.6  |
| 30; 10                                                                                                         | 13.1±2.1           | 8.7±1.0 | 2.1±0.9 | 62.5±5.3  | 27.8±0.3 | 7.8±3.4  |
| 30; 55                                                                                                         | 16.5±1.9           | 3.3±0.1 | 2.6±0.4 | 35.4±2.8  | 5.5±2.3  | 4.3±0.8  |
| 30; 100                                                                                                        | 12.2±0.0           | 4.7±0.4 | 1.5±0.4 | 12.4±1.3  | 2.8±0.2  | 2.1±0.6  |
| 30; 145                                                                                                        | 10.2±0.7           | 3.5±0.1 | 5.0±0.5 | 8.8±0.6   | 2.1±0.6  | 4.3±0.2  |

**Table S7.** Two-way factorial ANOVA of Phyco/Chl *a* ratio and Phyco/Car ratio measured in *Synechococcus* sp. Type 1, Type 2, and Type 3a growing at different temperatures (°C) and irradiance ( $\mu\text{mol photons m}^{-2}\text{s}^{-1}$ ): df – degrees of freedom; F – Fisher's F-test statistic; Mss – mean sum of squares; Ss – sum of squares. Levels of significance were: \*  $p < 0.05$ ; \*\*  $p < 0.01$ ; \*\*\*  $p < 0.001$ .

| <i>Synechococcus</i> sp. | Cell-specific pigment ratio | Source of variation | Df | Ss       | Mss      | F        |
|--------------------------|-----------------------------|---------------------|----|----------|----------|----------|
| Type 1                   | Phyco/Chl <i>a</i>          | temperature         | 2  | 899.094  | 449.547  | 273.9*** |
|                          |                             | irradiation         | 3  | 32.637   | 10.879   | 6.6**    |
|                          |                             | interaction         | 6  | 80.841   | 13.474   | 8.2***   |
|                          |                             | error               | 24 | 39.395   | 1.641    |          |
|                          | Phyco/Car                   | temperature         | 2  | 4884.169 | 2442.085 | 586.1*** |
|                          |                             | irradiation         | 3  | 4181.679 | 1393.893 | 334.5*** |
|                          |                             | interaction         | 6  | 2533.782 | 422.297  | 101.4*** |
|                          |                             | error               | 24 | 99.998   | 4.167    |          |
| Type 2                   | Phyco/Chl <i>a</i>          | temperature         | 2  | 111.229  | 55.614   | 45.2***  |
|                          |                             | irradiation         | 3  | 18.543   | 6.181    | 5.0**    |
|                          |                             | interaction         | 6  | 65.828   | 10.971   | 8.9***   |
|                          |                             | error               | 24 | 29.502   | 1.229    |          |
|                          | Phyco/Car                   | temperature         | 2  | 306.250  | 153.125  | 70.0***  |
|                          |                             | irradiation         | 3  | 1150.132 | 383.377  | 175.2*** |
|                          |                             | interaction         | 6  | 495.006  | 82.501   | 37.7***  |
|                          |                             | error               | 24 | 52.521   | 2.188    |          |
| Type 3a                  | Phyco/Chl <i>a</i>          | temperature         | 2  | 13.711   | 6.855    | 5.4*     |
|                          |                             | irradiation         | 3  | 19.799   | 6.600    | 5.2**    |
|                          |                             | interaction         | 6  | 39.000   | 6.500    | 5.2**    |
|                          |                             | error               | 24 | 30.289   | 1.262    |          |
|                          | Phyco/Car                   | temperature         | 2  | 125.716  | 62.858   | 19.4***  |
|                          |                             | irradiation         | 3  | 701.862  | 233.954  | 72.1***  |
|                          |                             | interaction         | 6  | 227.182  | 37.864   | 11.7***  |
|                          |                             | error               | 24 | 77.912   | 3.246    |          |
